# Supplementary material for: Improving the performance of TS-1 catalysts for continuous cyclohexanone ammoximation through controlment of active species distribution
Source: Royal Society of Chemistry journal article supplement (doi:10.1039/c4nj00455h), 2014-06-24
Supplement: c4nj00455h1.pdf [file c4nj00455h1.pdf]

## Electronic Supplementary Information (ESI) for

# Improve the performance of TS-1 catalyst for continuous cyclohexanone ammoximation through controlment of active species distribution

Yan Xue,<sup>a,b</sup> Yunlong Xie,<sup>c</sup> Huijuan Wei,<sup>a</sup> Yiqiang Wen,<sup>a</sup> Xiangyu Wang<sup>\*a</sup> and Baojun Li<sup>\*a</sup>

<sup>a</sup> Institute of Industrial Catalysis and College of Chemistry and Molecular Engineering, Zhengzhou University, 100 Science Road, Zhengzhou 450001, P R China

<sup>b</sup> Biological and chemical engineering college, Nanyang Institute of Technology, 80 Changjiang Road, Nanyang 473004, P R China

<sup>c</sup> Institute of Physical Chemistry, Zhejiang Normal University, 688 Yingbin Road, Jinhua 321004, P R China

\*Corresponding author. E-mail: xiangyuwang@zzu.edu.cn and lbjfc@zzu.edu.cn

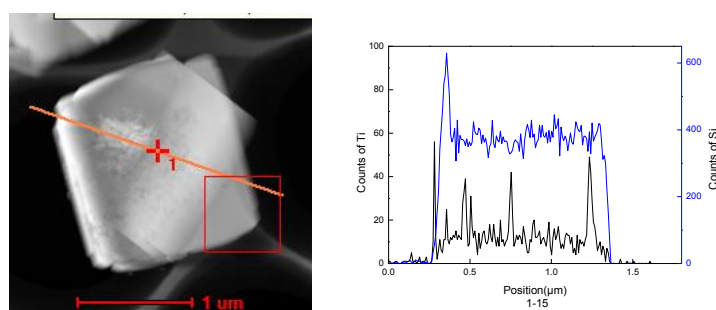

Figure S1. EDS line scans of TS-1 raw powder.

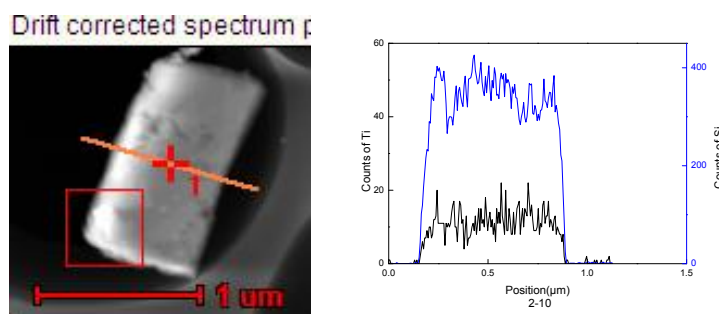

Figure S2. EDS line scans of M-TS-1.

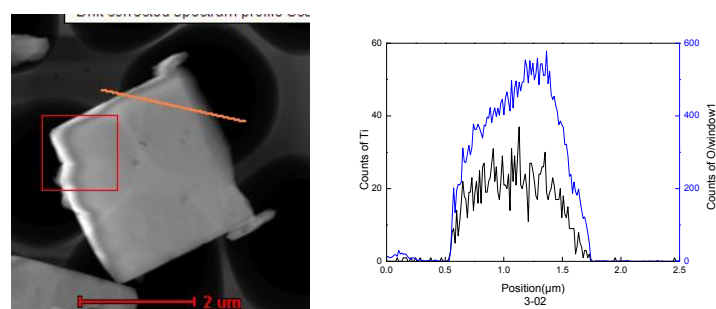

Figure S3. EDS line scans of R-TS-1.
